# Supplementary material
Source: ML conference proceedings conference paper supplement (https://proceedings.neurips.cc/paper_files/paper/2016/hash/4f6ffe13a5d75b2d6a3923922b3922e5-Abstract.html)
Supplement: Supplementary file [file 4f6ffe13a5d75b2d6a3923922b3922e5-Supplemental.zip]

---

# Appendix: A Simple Practical Accelerated Method for Finite Sums

---

Aaron Defazio  
Ambiata, Sydney Australia

## 1 Proximal operators

For the most common binary classification and regression methods, implementing the proximal operator is straight-forward. In this section let  $y_j$  be the label or target for regression, and  $X_j$  the data instance vector. We assume for binary classification that  $y_j \in \{-1, 1\}$ .

**Hinge loss:**

$$f_j(z) = l(z; y_j, X_j) = \max\{0, 1 - y_j \langle z, X_j \rangle\}.$$

The proximal operator has a closed form expression:

$$\text{prox}_{\gamma f_j}(z) = z - \gamma y_j \nu X_j,$$

where:

$$s = \frac{1 - y_j \langle z, X_j \rangle}{\gamma \|X_j\|^2},$$
$$\nu = \begin{cases} -1 & s \geq 1 \\ 0 & s \leq 0 \\ -s & \text{otherwise} \end{cases}.$$

**Logistic loss:**

$$f_j(z) = l(z; y_j, X_j) = \log(1 + \exp(-y_j X_j^T z)).$$

There is no closed form expression, however it can be computed very efficiently using Newton iteration, since it can be reduced to a 1D minimization problem. In particular, let  $c_0 = 0$ ,  $\gamma' = \gamma \|X_j\|^2$ , and  $a = \langle z, X_j \rangle$ . Then iterate until convergence:

$$s^k = \frac{-y_j}{1 + \exp(y_j c^k)},$$
$$c^{k+1} = c^k - \frac{\gamma' s^k + c^k - a}{1 - y' s^k - \gamma' s^k c^k}.$$

The prox operator is then  $\text{prox}_{\gamma f_j}(z) = z - (a - c^k) X_j / \|X_j\|^2$ . Three iterations are generally enough, but ill-conditioned problems or large step sizes may require up to 12. Correct initialization is important, as it will diverge when initialized with a point on the opposite side of 0 from the solution.

**Squared loss:**

$$f_j(z) = l(z; y_j, X_j) = \frac{1}{2} (X_j^T z - y_j)^2.$$

Let  $\gamma' = \gamma \|X_j\|^2$  and  $a = \langle z, X_j \rangle$ . Define:

$$c = \frac{a + \gamma' y}{1 + \gamma'}.$$

Then  $\text{prox}_{\gamma f_j}(z) = z - (a - c) X_j / \|X_j\|^2$ .

## L2 regularization

Including a regularizer within each  $f_i$ , i.e.  $F_i(x) = f_i(x) + \frac{\mu}{2} \|x\|^2$ , can be done using the proximal operator of  $f_i$ . Define the scaling factor:

$$\rho = 1 - \frac{\mu\gamma}{1 + \mu\gamma}.$$

Then  $\text{prox}_{\gamma F_i}(z) = \text{prox}_{\rho\gamma f_i}(\rho z)$ .

## 2 Proofs

**Lemma 1.** *Under Algorithm 1, taking the expectation over the random choice of  $j$ , conditioning on  $x^k$  and each  $g_i^k$ , allows us to bound the following inner product at step  $k$ :*

$$\begin{aligned} & E \left\langle \gamma \left[ g_j^k - \frac{1}{n} \sum_{i=1}^n g_i^k \right] - \gamma g_j^*, (x^k - x^*) + \gamma \left[ g_j^k - \frac{1}{n} \sum_{i=1}^n g_i^k \right] - \gamma g_j^* \right\rangle \\ & \leq \gamma^2 \frac{1}{n} \sum_{i=1}^n \|g_i^k - g_i^*\|^2. \end{aligned}$$

*Proof.* We start by splitting on the right hand side of the inner product:

$$\begin{aligned} & = E \left\langle \gamma \left[ g_j^k - \frac{1}{n} \sum_{i=1}^n g_i^k \right] - \gamma g_j^*, x^k - x^* \right\rangle \\ & + E \left\langle \gamma \left[ g_j^k - \frac{1}{n} \sum_{i=1}^n g_i^k \right] - \gamma g_j^*, \gamma \left[ g_j^k - \frac{1}{n} \sum_{i=1}^n g_i^k \right] - \gamma g_j^* \right\rangle \end{aligned} \quad (1)$$

The first inner product has expectation 0 on the left hand side (Recall that  $E[g_j^*] = 0$ ), so it's simply 0 in expectation (we may take expectation on the left since the right doesn't depend on  $j$ ). The second inner product is the same on both sides, so we may convert it to a norm-squared term. So we have:

$$\begin{aligned} & = \gamma^2 E \left\| g_j^k - \frac{1}{n} \sum_{i=1}^n g_i^k - g_j^* \right\|^2 \\ & \leq \gamma^2 E \|g_j^k - g_j^*\|^2 = \gamma^2 \frac{1}{n} \sum_{i=1}^n \|g_i^k - g_i^*\|^2. \end{aligned}$$

The inequality used is just an application of the variance formula  $E[(X - E[X])^2] = E[X^2] - E[X]^2 \leq E[X^2]$ .  $\square$

**Corollary 2.** *Chaining the main theorem gives a convergence rate for point-saga at step  $k$  under the constants given in of:*

$$E \|x^k - x^*\|^2 \leq (1 - \kappa)^k \frac{\mu + L}{\mu} \|x^0 - x^*\|^2,$$

if each  $f_i : \mathbb{R}^d \rightarrow \mathbb{R}$  is  $L$ -smooth and  $\mu$ -strongly convex.

*Proof.* First we simplify  $T^0$  using  $c = 1/\mu L$  and use Lipschitz smoothness:

$$\begin{aligned} T^0 & = \frac{1}{\mu L} \cdot \frac{1}{n} \sum_i \|g_i^0 - g_i^*\|^2 + \|x^0 - x^*\|^2 \\ & \leq \frac{L}{\mu} \cdot \|x^0 - x^*\|^2 + \|x^0 - x^*\|^2 \\ & = \frac{\mu + L}{\mu} \|x^0 - x^*\|^2. \end{aligned}$$

Now recall that the main theorem gives a bound  $E [T^{k+1}] \leq (1 - \kappa) T^k$  where the expectation is conditional on  $x^k$  and each  $g_i^k$  from step  $k$ , taking expectation over the randomness in the choice of  $j$ . We can further take expectation with respect to  $x^k$  and each  $g_i^k$ , giving the unconditional bound:

$$E [T^{k+1}] \leq (1 - \kappa) E [T^k].$$

Chaining over  $k$  gives the result.  $\square$

**Theorem 3.** Suppose each  $f_i : \mathbb{R}^d \rightarrow \mathbb{R}$  is  $\mu$ -strongly convex,  $\|g_i^0 - g_i^*\| \leq B$  and  $\|x^0 - x^*\| \leq R$ . Then after  $k$  iterations of Point-SAGA with step size  $\gamma = R/B\sqrt{n}$ :

$$E \|\bar{x}^k - x^*\|^2 \leq 2 \frac{\sqrt{n} (1 + \mu (R/B\sqrt{n}))}{\mu k} RB,$$

where  $\bar{x}^k = \frac{1}{k} E \sum_{t=1}^k x^t$ .

*Proof.* Recall the bound on the Lyapunov function established in the main theorem:

$$\begin{aligned} E [T^{k+1}] &\leq T^k + \left( \alpha\gamma^2 - \frac{c}{n} \right) \frac{1}{n} \sum_i^n \|g_i^k - g_i^*\|^2 \\ &\quad + \left( \frac{c}{n} - \alpha\gamma^2 - \frac{\alpha\gamma}{L} \right) E \|g_j^{k+1} - g_j^*\|^2 \\ &\quad - \kappa E \|x^k - x^*\|^2. \end{aligned}$$

In the non-smooth case this holds with  $L = \infty$ . In particular, if we take  $c = \alpha\gamma^2 n$ , then:

$$-\kappa E \|x^{k+1} - x^*\|^2 \geq E [T^{k+1}] - T^k.$$

Recall that this expectation is (implicitly) conditional on  $x^k$  and each  $g_i^k$  from step  $k$ , Taking expectation over the randomness in the choice of  $j$ . We can further take expectation with respect to  $x^k$  and each  $g_i^k$ , and negate the inequality, giving the unconditional bound:

$$\kappa E \|x^{k+1} - x^*\|^2 \leq E [T^k] - E [T^{k+1}].$$

We now sum this over  $t = 0 \dots k$ :

$$\kappa E \sum_{t=1}^k \|x^t - x^*\|^2 \leq T^0 - E [T^k].$$

We can drop the  $-E [T^k]$  since it is always negative. Dividing through by  $k$ :

$$\frac{1}{k} E \sum_{t=1}^k \|x^t - x^*\|^2 \leq \frac{1}{\kappa k} T^0.$$

Now using Jensen's inequality on the left gives:

$$E \|\bar{x}^k - x^*\|^2 \leq \frac{1}{\kappa k} T^0,$$

where  $\bar{x}^k = \frac{1}{k} E \sum_{t=1}^k x^t$ . Now we plug in  $T^0 = \frac{c}{n} \sum_i \|g_i^0 - g_i^*\|^2 + \|x^0 - x^*\|^2$  with  $c = \alpha\gamma^2 n \leq \gamma^2 n$ :

$$E \|\bar{x}^k - x^*\|^2 \leq \frac{\gamma^2 n}{\kappa k} \frac{1}{n} \sum_i \|g_i^0 - g_i^*\|^2 + \frac{1}{\kappa k} \|x^0 - x^*\|^2.$$

Now we plug in the bounds in terms of  $B$  and  $R$ :

$$E \|\bar{x}^k - x^*\|^2 \leq \frac{\gamma^2 n}{\kappa k} B^2 + \frac{1}{\kappa k} R^2.$$

In order to balance the terms on the right, we need:

$$\frac{\gamma^2 n}{\kappa k} B^2 = \frac{1}{\kappa k} R^2,$$

$$\begin{aligned}\therefore \gamma^2 n B^2 &= R^2, \\ \therefore \gamma^2 &= \frac{R^2}{n B^2}.\end{aligned}$$

So we can take  $\gamma = R/B\sqrt{n}$ , giving a rate of:

$$\begin{aligned}E \|\bar{x}^k - x^*\|^2 &\leq \frac{2}{\kappa k} R^2 \\ &= 2 \frac{1 + \mu\gamma}{\mu\gamma k} R^2 \\ &= 2 \frac{\sqrt{n} (1 + \mu (R/B\sqrt{n}))}{\mu k} R B.\end{aligned}$$

□

### 3 Proximal operator bounds

In this section we rehash some simple bounds from proximal operator theory that we will use in this work. Define the short-hand  $p_{\gamma f}(x) = \text{prox}_{\gamma f}(x)$ , and let  $g_{\gamma f}(x) = \frac{1}{\gamma} (x - p_{\gamma f}(x))$ , so that  $p_{\gamma f}(x) = x - \gamma g_{\gamma f}(x)$ . Note that  $g_{\gamma f}(x)$  is a subgradient of  $f$  at the point  $p_{\gamma f}(x)$ . This relation is known as the optimality condition of the proximal operator.

We will also use a few standard convexity bounds without proof. Let  $f : \mathbb{R}^d \rightarrow \mathbb{R}$  be a convex function with strong convexity constant  $\mu \geq 0$  and Lipschitz smoothness constant  $L$ . Let  $x^*$  be the minimizer of  $f$ , then for any  $x, y \in \mathbb{R}^d$ :

$$\langle f'(x) - f'(y), x - y \rangle \geq \mu \|x - y\|^2, \quad (2)$$

$$\|f'(x) - f'(y)\|^2 \leq L^2 \|x - y\|^2. \quad (3)$$

**Proposition 4.** (Firm non-expansiveness) For any  $x, y \in \mathbb{R}^d$ , and any convex function  $f : \mathbb{R}^d \rightarrow \mathbb{R}$  with strong convexity constant  $\mu \geq 0$ ,

$$\langle x - y, p_{\gamma f}(x) - p_{\gamma f}(y) \rangle \geq (1 + \mu\gamma) \|p_{\gamma f}(x) - p_{\gamma f}(y)\|^2.$$

*Proof.* Using strong convexity of  $f$ , we apply Equation 2 at the (sub-)gradients  $g_{\gamma f}(x)$  and  $g_{\gamma f}(y)$ , and their corresponding points  $p_{\gamma f}(x)$  and  $p_{\gamma f}(y)$ :

$$\langle g_{\gamma f}(x) - g_{\gamma f}(y), p_{\gamma f}(x) - p_{\gamma f}(y) \rangle \geq \mu \|p_{\gamma f}(x) - p_{\gamma f}(y)\|^2.$$

We now multiply both sides by  $\gamma$ , then add  $\|p_{\gamma f}(x) - p_{\gamma f}(y)\|^2$  to both sides:

$$\langle p_{\gamma f}(x) + \gamma g_{\gamma f}(x) - p_{\gamma f}(y) - \gamma g_{\gamma f}(y), p_{\gamma f}(x) - p_{\gamma f}(y) \rangle \geq (1 + \mu\gamma) \|p_{\gamma f}(x) - p_{\gamma f}(y)\|^2,$$

leading to the bound by using the optimality condition:  $p_{\gamma f}(x) + \gamma g_{\gamma f}(x) = x$ . □

**Proposition 5.** (Moreau decomposition) For any  $x \in \mathbb{R}^d$ , and any convex function  $f : \mathbb{R}^d \rightarrow \mathbb{R}$  with Fenchel conjugate  $f^*$ :

$$p_{\gamma f}(x) = x - \gamma p_{\frac{1}{\gamma} f^*}(x/\gamma). \quad (4)$$

Recall our definition of  $g_{\gamma f}(x) = \frac{1}{\gamma} (x - p_{\gamma f}(x))$  also. After combining, the following relation thus holds between the proximal operator of the conjugate  $f^*$  and  $g_{\gamma f}$ :

$$p_{\frac{1}{\gamma} f^*}(x/\gamma) = \frac{1}{\gamma} (x - p_{\gamma f}(x)) = g_{\gamma f}(x). \quad (5)$$

*Proof.* Let  $u = p_{\gamma f}(x)$ , and  $v = \frac{1}{\gamma}(x - u)$ . Then  $v \in \partial f(u)$  by the optimality condition of the proximal operator of  $f$  (namely if  $u = p_{\gamma f}(x)$  then  $u = x - \gamma v \Leftrightarrow v \in \partial f(u)$ ). It follows by conjugacy of  $f$  that  $u \in \partial f^*(v)$ . Thus we may interpret  $v = \frac{1}{\gamma}(x - u)$  as the optimality condition of a proximal operator of  $f^*$  :

$$v = p_{\frac{1}{\gamma}f^*}\left(\frac{1}{\gamma}x\right).$$

Plugging in the definition of  $v$  then gives:

$$\frac{1}{\gamma}(x - u) = p_{\frac{1}{\gamma}f^*}\left(\frac{1}{\gamma}x\right).$$

Further plugging in  $u = p_{\gamma f}(x)$  and rearranging gives the result. □
